# Supplementary material
Source: Springer Nature journal article supplement (https://www.springermedizin.de/resource/supplementary/12885_2013_4177_MOESM2_ESM.pdf/9465664)
Supplement: MOESM2 [file 9465664]

**A** Distant disease-free survival (DDFS) by St Gallen molecular subtypes in matched lymph node metastases

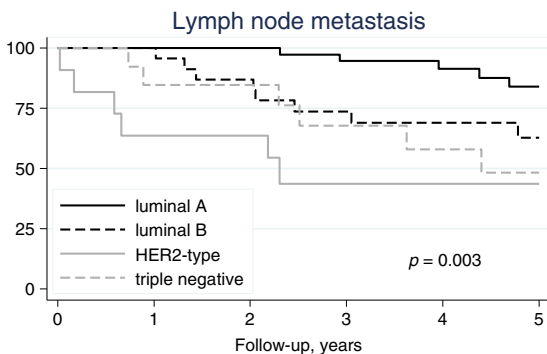

Numbers at risk

|                 |    |    |    |    |    |    |
|-----------------|----|----|----|----|----|----|
| luminal A       | 38 | 38 | 37 | 35 | 27 | 21 |
| luminal B       | 23 | 23 | 20 | 16 | 14 | 10 |
| HER2-type       | 11 | 7  | 7  | 4  | 4  | 4  |
| triple negative | 13 | 11 | 10 | 7  | 6  | 5  |

**B** Overall survival (OS) by St Gallen molecular subtypes in matched lymph node metastases

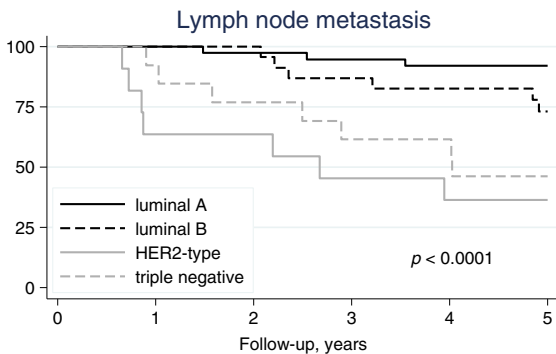

Number at risk

|                 |    |    |    |    |    |    |
|-----------------|----|----|----|----|----|----|
| luminal A       | 38 | 38 | 37 | 36 | 33 | 29 |
| luminal B       | 23 | 23 | 23 | 20 | 19 | 15 |
| HER2-type       | 11 | 7  | 7  | 5  | 4  | 4  |
| triple negative | 13 | 12 | 10 | 8  | 8  | 6  |
